# Supplementary material
Source: PubMed Central journal article supplement (PMC5134674)
Supplement: NIHMS809576-supplement-Supp_info.pdf [file NIHMS809576-supplement-Supp_info.pdf]

## **SUPPLEMENTARY INFORMATION**

### **Elucidation of a Mechanism of Oxidative Stress Regulation in**

#### ***Francisella tularensis* Live Vaccine Strain**

*Zhuo Ma*<sup>1</sup>, *Vincenzo C. Russo*<sup>1</sup>, *Seham M. Rabadi*<sup>2</sup>, *Yu Jen*<sup>3</sup>, *Sally V. Catlett*<sup>1</sup>,  
*Chandra Shekhar Bakshi*<sup>2\*</sup> and *Meenakshi Malik*<sup>1\*</sup>

\*To whom correspondence should be addressed:

Chandra Shekhar Bakshi, Department of Microbiology and Immunology, BSB 340, New York Medical College, 15 Dana Road, Valhalla; New York 10595, Phone: (914) 594-4814; Fax: (914) 594-4779; E mail: [Shekhar\\_Bakshi@nymc.edu](mailto:Shekhar_Bakshi@nymc.edu)

Meenakshi Malik, Department of Basic and Social Sciences, Albany College of Pharmacy and Health Sciences, 106 New Scotland Avenue, Albany, New York 12208, Phone: (518) 694-7168; E mail: [Meenakshi.Malik@acphs.edu](mailto:Meenakshi.Malik@acphs.edu)

<sup>1</sup>*Department of Basic and Social Sciences, Albany College of Pharmacy and Health Sciences, Albany, New York, United States of America*

<sup>2</sup>*Department of Microbiology and Immunology, New York Medical College, Valhalla, New York, United States of America*

<sup>3</sup>*Department of Pathology, Westchester Medical Center, Valhalla, New York, United States of America*

**Running title:** Regulation of oxidative stress resistance in *Francisella tularensis*

Table S1

|                               |                                                                                       | Hydrogen Peroxide (-) |             | Hydrogen Peroxide (+) |             |
|-------------------------------|---------------------------------------------------------------------------------------|-----------------------|-------------|-----------------------|-------------|
|                               |                                                                                       | Mean                  | SD          | Mean                  | SD          |
| <b>Stress related protein</b> |                                                                                       |                       |             |                       |             |
| FTL_1015                      | AhpC/TSA family protein                                                               | -0.37                 | 0.104651804 | -0.352                | 0.101823376 |
| FTL_1791                      | Superoxide dismutase                                                                  | -0.368                | 0.424264069 | -0.32                 | 0.028284271 |
| FTL_1571                      | Thioredoxin reductase                                                                 | 0.024                 | 0.158391919 | -0.248                | 0.135764502 |
| FTL_1714                      | Chaperonin GroEL                                                                      | -0.044                | 0.113137085 | -0.038                | 0.308298557 |
| FTL_1715                      | Co-chaperonin GroES                                                                   | 0.096                 | 0.011313708 | -0.344                | 0.073539105 |
| FTL_1191                      | Molecular chaperone Dnak                                                              | -0.016                | 0.141421356 | 0.416                 | 0.214920461 |
| FTL_0094                      | ClpB protein                                                                          | 0.136                 | 0.022627417 | 0.344                 | 0.231931024 |
| FTL_1957                      | Heat shock protein                                                                    | -0.438                | 0.608111832 | 0.53                  | 0.647709812 |
| FTL_0457                      | Cold Shock Protein                                                                    | 0.01                  | 0.353553391 | -0.386                | 0.110308658 |
| FTL_1392                      | Cold-shock DEAD-box protein A                                                         | -0.382                | 0.51194531  | -0.034                | 0.195161472 |
| FTL_0166                      | Universal Stress Protein                                                              | 0.084                 | 0.220617316 | -0.488                | 0.271529004 |
| FTL_1413                      | (p)ppGpp synthase/guanosine-3',5'-bis(diphosphate) 3'-pyrophosphohydrolase            | -0.015                | 0.06363961  | -0.77                 | 0.834386002 |
| <b>Translation</b>            |                                                                                       |                       |             |                       |             |
| FTL_1236                      | Translation Initiation factor IF-1                                                    | 0.046                 | 0.330925974 | -0.146                | 0.053740115 |
| FTL_1751                      | Elongation Factor Tu                                                                  | -0.32                 | 0.18667619  | 0.004                 | 0.254558441 |
| FTL_0234                      | Elongation Factor G                                                                   | -0.006                | 0.01979899  | 0.236                 | 0.045254834 |
| FTL_0225                      | Elongation Factor Ts                                                                  | -0.056                | 0.005656854 | 0.234                 | 0.1668772   |
| FTL_0768                      | GTP binding translational elongation factor Tu and G family protein                   | -0.016                | 0.197989899 | 0.518                 | 0.421435642 |
| <b>Transcription</b>          |                                                                                       |                       |             |                       |             |
| FTL_1474                      | Transcription elongation factor GreA                                                  | 0.056                 | 0.118793939 | 0.11                  | 0.376180808 |
| FTL_1810                      | Transcription elongation factor NusA                                                  | -0.026                | 0.098994949 | 0.308                 | 0.016970563 |
| FTL_0610                      | Transcription termination factor Rho                                                  | -0.016                | 0.045254834 | -0.322                | 0.042426407 |
| <b>Transport proteins</b>     |                                                                                       |                       |             |                       |             |
| FTL_1870                      | Putative ABC transporter ATP-binding protein                                          | -0.044                | 0.073539105 | -0.13                 | 0.031112698 |
| FTL_1229                      | ABC transporter ATP-binding protein                                                   | 0.046                 | 0.110308658 | 0.314                 | 0.01979899  |
| FTL_1065                      | ABC transporter ATP-binding protein                                                   | -0.014                | 0.042426407 | -0.286                | 0.070710678 |
| FTL_0679                      | Polyamine Transporter                                                                 | -0.016                | 0.141421356 | -0.218                | 0.036769553 |
| <b>Regulatory proteins</b>    |                                                                                       |                       |             |                       |             |
| FTL_0895                      | Histone-like protein HU form B                                                        | 0.04                  | 0.277185858 | -0.22                 | 0.073539105 |
| FTL_1179                      | Sigma 54 modulation protein                                                           | -0.08                 | 0.152735065 | 0.182                 | 0.025455844 |
| FTL_0851                      | RNA polymerase factor sigma-32                                                        | 0.014                 | 0.036769553 | 0.082                 | 0.065053824 |
| <b>Metabolism and others</b>  |                                                                                       |                       |             |                       |             |
| FTL_0454                      | Glucosamine-fructose-6-phosphate aminotransferase                                     | 0.416                 | 0.305470129 | -1.206                | 0.217788889 |
| FTL_0114                      | Intracellular growth locus, subunit D                                                 | -0.05                 | 0.336582828 | 0.136                 | 0.056568542 |
| FTL_1801                      | F0F1 ATP synthase subunit alpha                                                       | -0.008                | 0.050911688 | -0.182                | 0.025455844 |
| FTL_1800                      | F0F1 ATP Synthase subunit gamma                                                       | -0.056                | 0.169705627 | -0.606                | 0.025455844 |
| FTL_0519                      | Septum site-determining protein MinD                                                  | -0.022                | 0.251730014 | 0.19                  | 0.127279221 |
| FTL_1789                      | Citrate synthase                                                                      | 0.008                 | 0.175362482 | -0.134                | 0.002828427 |
| FTL_1490                      | Phosphoglyceromutase                                                                  | 0.078                 | 0.065053824 | -0.34                 | 0.237587878 |
| FTL_0538                      | (3R)-hydroxymyristoyl-ACP dehydratase                                                 | -0.018                | 0.132936075 | -0.31                 | 0.01979899  |
| FTL_0592                      | dTDP-glucose 4,6-dehydratase                                                          | 0.006                 | 0.1668772   | -0.218                | 0.008485281 |
| FTL_1166                      | Hypothetical protein                                                                  | 0.05                  | 0.093338095 | 0.45                  | 0.461033621 |
| FTL_1164                      | Hypothetical protein                                                                  | 0.08                  | 0.118793939 | 0.276                 | 0.14707821  |
| FTL_0984                      | bifunctional guaredoxin/ribonucleoside-diphosphate reductase subunit beta             | 0.038                 | 0.172534055 | 0.126                 | 0.031112698 |
| FTL_1118                      | Hypothetical protein                                                                  | -0.046                | 0.093338095 | -0.154                | 0.031112698 |
| FTL_0423                      | Hypothetical protein                                                                  | -0.01                 | 0.1668772   | -0.254                | 0.24607316  |
| FTL_0582                      | Hypothetical protein                                                                  | 0.016                 | 0.152735065 | 0.332                 | 0.028284271 |
| FTL_0537                      | UDP-3-O-[3-hydroxymyristoyl] glucosamine N-acyltransferase                            | 0.08                  | 0.056568542 | 0.338                 | 0.132936075 |
| FTL_0449                      | Hypothetical protein                                                                  | -0.052                | 0.096166522 | -0.394                | 0.087681241 |
| FTL_0097                      | Hypothetical protein                                                                  | 0.056                 | 0.169705627 | 0.182                 | 0.014142136 |
| FTL_0596                      | UDP-glucose/GDP-mannose dehydrogenase                                                 | -0.054                | 0.076367532 | 0.24                  | 0.079195959 |
| FTL_1546                      | Pyridoxal biosynthesis lyase PdxS                                                     | 0.056                 | 0.050911688 | -0.162                | 0.053740115 |
| FTL_1139                      | 3-oxoacyl-(acyl-carrier-protein) reductase                                            | 0.032                 | 0.084852814 | -0.26                 | 0.056568542 |
| FTL_1310                      | Nucleoside diphosphate kinase                                                         | 0                     | 0.113137085 | -0.194                | 0.127279221 |
| FTL_1785                      | Succinate dehydrogenase iron-sulfur subunit                                           | -0.032                | 0.096166522 | 0.324                 | 0.03959798  |
| FTL_1272                      | Biotin synthase                                                                       | -0.022                | 0.036769553 | 0.292                 | 0.045254834 |
| FTL_0479                      | Glycine dehydrogenase subunit 1                                                       | 0.002                 | 0.132936075 | -0.176                | 0           |
| FTL_1784                      | 2-oxoglutarate dehydrogenase E1 component                                             | -0.04                 | 0.016970563 | -0.122                | 0.031112698 |
| FTL_0480                      | Glycine dehydrogenase subunit 2                                                       | 0.002                 | 0.138592929 | 0.236                 | 0.073539105 |
| FTL_0421                      | Lipoprotein                                                                           | 0.022                 | 0.01979899  | 0.274                 | 0.200818326 |
| FTL_0424                      | Lipoprotein                                                                           | -0.036                | 0.028284271 | -0.57                 | 0.115965512 |
| FTL_0405                      | Menaquinone biosynthesis methyltransferase                                            | -0.024                | 0.045254834 | 0.27                  | 0.20647518  |
| FTL_0157                      | Hypothetical protein                                                                  | 0.036                 | 0.028284271 | 0.47                  | 0.240416306 |
| FTL_1899                      | Glutamine synthetase                                                                  | 0.022                 | 0.110308658 | -0.18                 | 0.022627417 |
| FTL_1060                      | D-alanyl-D-alanine carboxypeptidase                                                   | -0.002                | 0.014142136 | 0.144                 | 0.101823376 |
| FTL_0453                      | UDP-N-acetylglucosamine pyrophosphorylase/glucosamine-1-phosphate N-acetyltransferase | 0.022                 | 0.042426407 | 0.178                 | 0.025455844 |
| FTL_1266                      | Lipase/esterase                                                                       | -0.066                | 0.042426407 | 0.326                 | 0.025455844 |
| FTL_0717                      | Ribonuclease E                                                                        | -0.034                | 0.002828427 | 0.15                  | 0.048083261 |
| FTL_0886                      | (Dimethylallyl) adenosine tRNA methyltransferase                                      | 0.014                 | 0.115965512 | -0.566                | 0.172534055 |
| FTL_0987                      | Malate dehydrogenase                                                                  | -0.01                 | 0.01979899  | 0.249                 | 0.091923882 |
| FTL_0916                      | Ketol-acid reductoisomerase                                                           | 0.084                 | 0.164048773 | 0.162                 | 0.036769553 |
| FTL_0030                      | Carbamoyl phosphate synthase small subunit                                            | -0.074                | 0.05939697  | 0.226                 | 0.01979899  |
| FTL_0028                      | Aspartate carbamoyltransferase                                                        | 0.032                 | 0.056568542 | -0.378                | 0.161220346 |
| FTL_1842                      | Aspartyl/glutamyl-tRNA amidotransferase subunit A                                     | 0.042                 | 0.042426407 | 0.132                 | 0.022627417 |
| FTL_1018                      | Phosphoserine aminotransferase                                                        | 0.046                 | 0.093338095 | -0.402                | 0.098994949 |
| FTL_0739                      | tRNA uridine 5-carboxymethylaminomethyl modification protein GidA                     | -0.086                | 0.008485281 | -0.118                | 0.036769553 |
| FTL_1407                      | Threonyl-tRNA synthetase                                                              | -0.028                | 0.056568542 | 0.216                 | 0.050911688 |
| FTL_1861                      | Amidophosphoribosyltransferase                                                        | -0.03                 | 0.144249783 | 0.276                 | 0.130107648 |
| FTL_1775                      | Coproporphyrinogen III oxidase                                                        | 0.006                 | 0.01979899  | -0.206                | 0.065053824 |
| FTL_0536                      | Outer membrane protein OmpH                                                           | -0.006                | 0.070710678 | 0.286                 | 0.189504617 |
| FTL_0073                      | Hypothetical protein                                                                  | -0.082                | 0.172534055 | 0.436                 | 0.033941125 |
| FTL_1936                      | Periplasmic solute binding family protein                                             | -0.014                | 0.031112698 | 0.302                 | 0.042426407 |

|                           |                                                  |        |             |        |             |
|---------------------------|--------------------------------------------------|--------|-------------|--------|-------------|
| FTL_1332                  | HesB family protein                              | -0.102 | 0.234759451 | 0.222  | 0.031112698 |
| FTL_0306                  | Tryptophanyl-tRNA synthetase                     | -0.004 | 0.079195959 | -0.242 | 0.110308658 |
| FTL_0015                  | Propionate kinase                                | 0.014  | 0.048083261 | -0.114 | 0.002828427 |
| FTL_0049                  | D-tyrosyl-tRNA(Tyr) deacylase                    | -0.028 | 0.130107648 | 0.208  | 0.062225397 |
| FTL_0674                  | 3-methyl-2-oxobutanoate hydroxymethyltransferase | -0.072 | 0.237587878 | 0.266  | 0.053740115 |
| FTL_0439                  | Hypothetical protein                             | -0.068 | 0.175362482 | 0.308  | 0.090509668 |
| FTL_0261                  | DNA-directed RNA polymerase subunit alpha        | -0.106 | 0.008485281 | -0.03  | 0.132936075 |
| FTL_0937                  | Hypothetical protein                             | 0.078  | 0.05939697  | -0.156 | 0.118793939 |
| FTL_1537                  | Polynucleotide phosphorylase/polyadenylase       | 0      | 0.124450793 | -0.134 | 0.161220346 |
| FTL_0336                  | Peptidoglycan-associated lipoprotein             | 0.032  | 0.016970563 | -0.132 | 0.152735065 |
| FTL_1554                  | Succinyl-CoA synthetase, alpha subunit           | 0.032  | 0.011313708 | 0.104  | 0.101823376 |
| FTL_0960                  | Soluble pyridine nucleotide transhydrogenase     | 0.036  | 0.011313708 | 0.172  | 0.135764502 |
| FTL_1678                  | Hypothetical protein                             | -0.004 | 0.022627417 | -0.732 | 1.210566809 |
| FTL_1420                  | Carbohydrate/purine kinase pfkB family protein   | -0.012 | 0.113137085 | 0.294  | 0.104651804 |
| FTL_1286                  | Hypothetical protein                             | 0.026  | 0.048083261 | 0.136  | 0.079195959 |
| FTL_0582                  | Hypothetical protein                             | 0.016  | 0.152735065 | 0.334  | 0.025455844 |
| <b>Ribosomal proteins</b> |                                                  |        |             |        |             |
| FTL_0239                  | 50S L2                                           | -0.036 | 0.203646753 | -0.108 | 0.379009235 |
| FTL_1912                  | 30S S1                                           | 0.038  | 0.313955411 | 0.153  | 0.371938167 |
| FTL_0242                  | 30S S3                                           | -0.148 | 0.03959798  | 0.068  | 0.305470129 |
| FTL_0247                  | 50S L24                                          | -0.206 | 0.048083261 | 0.254  | 0.053740115 |
| FTL_1748                  | 50S L11                                          | -0.188 | 0.005656854 | -0.032 | 0.005656854 |
| FTL_0236                  | 50S L3                                           | -0.164 | 0.181019336 | -0.498 | 0.161220346 |
| FTL_0456                  | 30S S21                                          | 0      | 0.248901587 | -0.51  | 0.09338095  |
| FTL_1404                  | 50S L20                                          | -0.178 | 0.958836795 | -0.072 | 0.231931024 |
| FTL_0241                  | 50S L22                                          | -0.023 | 0.188090404 | -0.226 | 0.01979899  |
| FTL_0224                  | 30S S2                                           | -0.044 | 0.135764502 | -0.78  | 0.820243866 |
| FTL_0251                  | 50S L6                                           | -0.04  | 0.107480231 | -0.158 | 0.025455844 |
| FTL_0238                  | 50S L23                                          | -0.04  | 0.45254834  | -0.226 | 0.070710678 |
| FTL_0235                  | 30S S10                                          | 0.02   | 0.101823376 | 0.532  | 0.446891486 |
| FTL_0260                  | 30S S4                                           | 0.074  | 0.01979899  | 0.13   | 0.014142136 |
| FTL_0246                  | 50S L14                                          | -0.008 | 0.011313708 | 0.108  | 0.022627417 |
| FTL_1746                  | 50S L10                                          | 0      | 0.028284271 | -0.116 | 0.028284271 |
| FTL_0245                  | 30S S17                                          | -0.106 | 0.098994949 | 0.132  | 0.610940259 |
| FTL_1745                  | 50S L7/L12                                       | -0.024 | 0.050911688 | 0.34   | 0.345068109 |
| FTL_0250                  | 30S S8                                           | -0.114 | 0.20647518  | -0.27  | 0.223445743 |
| FTL_1538                  | 30S S15                                          | -0.032 | 0.079195959 | 0.148  | 0.090509668 |
| FTL_0258                  | 30S S13                                          | -0.036 | 0.124450793 | 0.17   | 0.234759451 |
| FTL_1453                  | 50S L21                                          | -0.012 | 0.033941125 | 0.308  | 0.18667619  |
| FTL_1452                  | 50S L27                                          | -0.202 | 0.353553391 | 0.254  | 0.082024387 |
| FTL_1026                  | 50S L9                                           | 0.054  | 0.002828427 | 0.376  | 0.311126984 |
| FTL_0950                  | 50S L25                                          | -0.034 | 0.002828427 | 0.138  | 0.149906638 |
| FTL_0237                  | 50S L4                                           | 0.042  | 0.025455844 | 0.18   | 0.022627417 |
| FTL_0521                  | 50S L33                                          | -0.018 | 0.070710678 | -0.362 | 0.01979899  |
| FTL_0243                  | 50S L16                                          | -0.026 | 0.014142136 | 0.354  | 0.002828427 |
| FTL_1047                  | 30S S21                                          | -0.152 | 0.164048773 | -0.25  | 0.042426407 |

**Table S1:** Differential induction of proteins in the  $\Delta oxyR$  mutant determined by iTRAQ analysis. To be identified as being significantly differentially produced, a protein was quantified in at least three spectra (allowing generation of a  $P$ -value), have a  $P$ -value of  $<0.05$ , and have a  $\text{Log}_2$  ratio fold change of  $>1.3$  or  $<0.7$  in replicates from two independent experiments. A ratio of  $>0.11$  indicated elevation, while a ratio of  $<-0.15$  indicated suppression of a protein. The values shown are cumulative of two independent iTRAQ experiments, each conducted with two biological replicates.



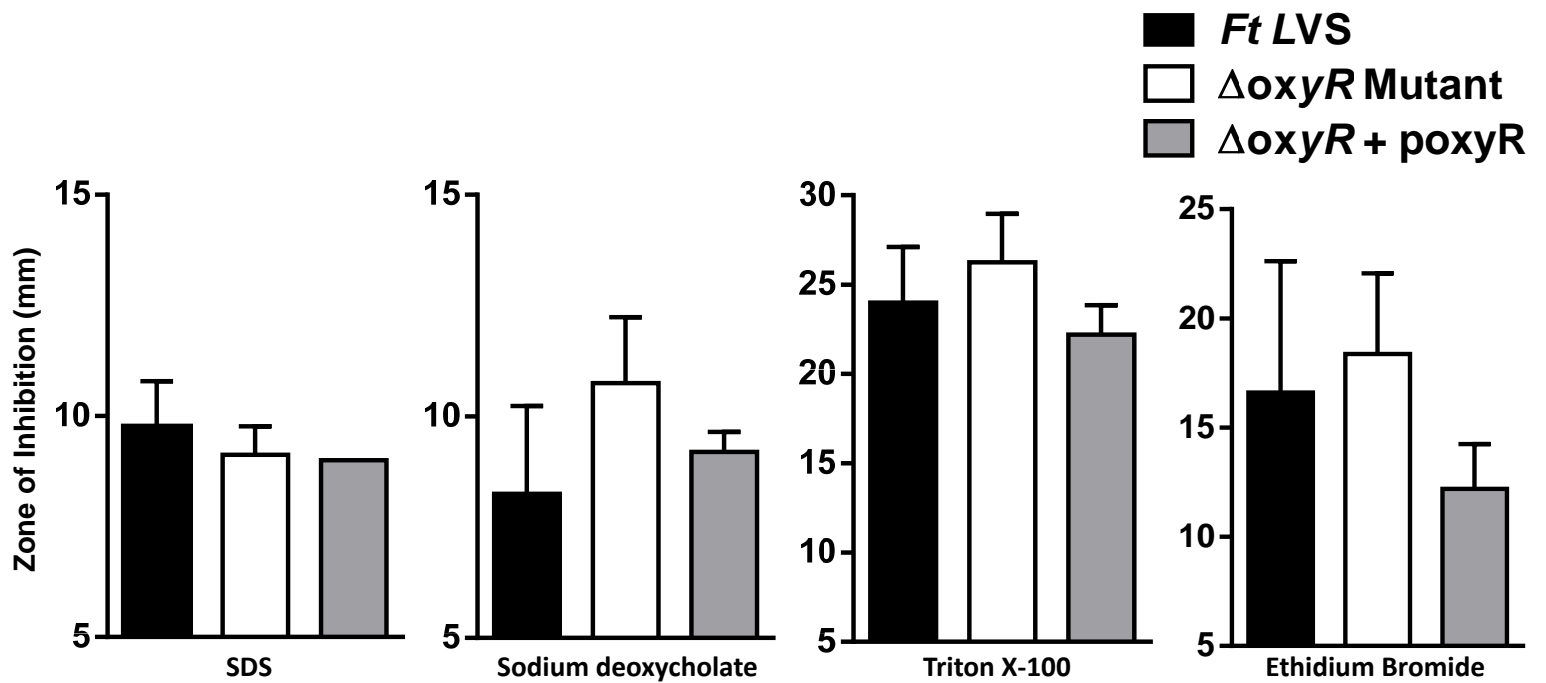

**Figure S2: OxyR of *F. tularensis* does not contribute to bacterial membrane integrity.** Disk diffusions assay with Sodium dodecyl sulfate (SDS; 750  $\mu\text{g}/\text{disk}$ ), Sodium deoxycholate (100  $\mu\text{g}/\text{disk}$ ), Triton X-100 (2.5% solution) and Ethidium bromide (5  $\mu\text{g}/\text{disk}$ ). The results are expressed as zone of inhibition around the discs in millimeters.

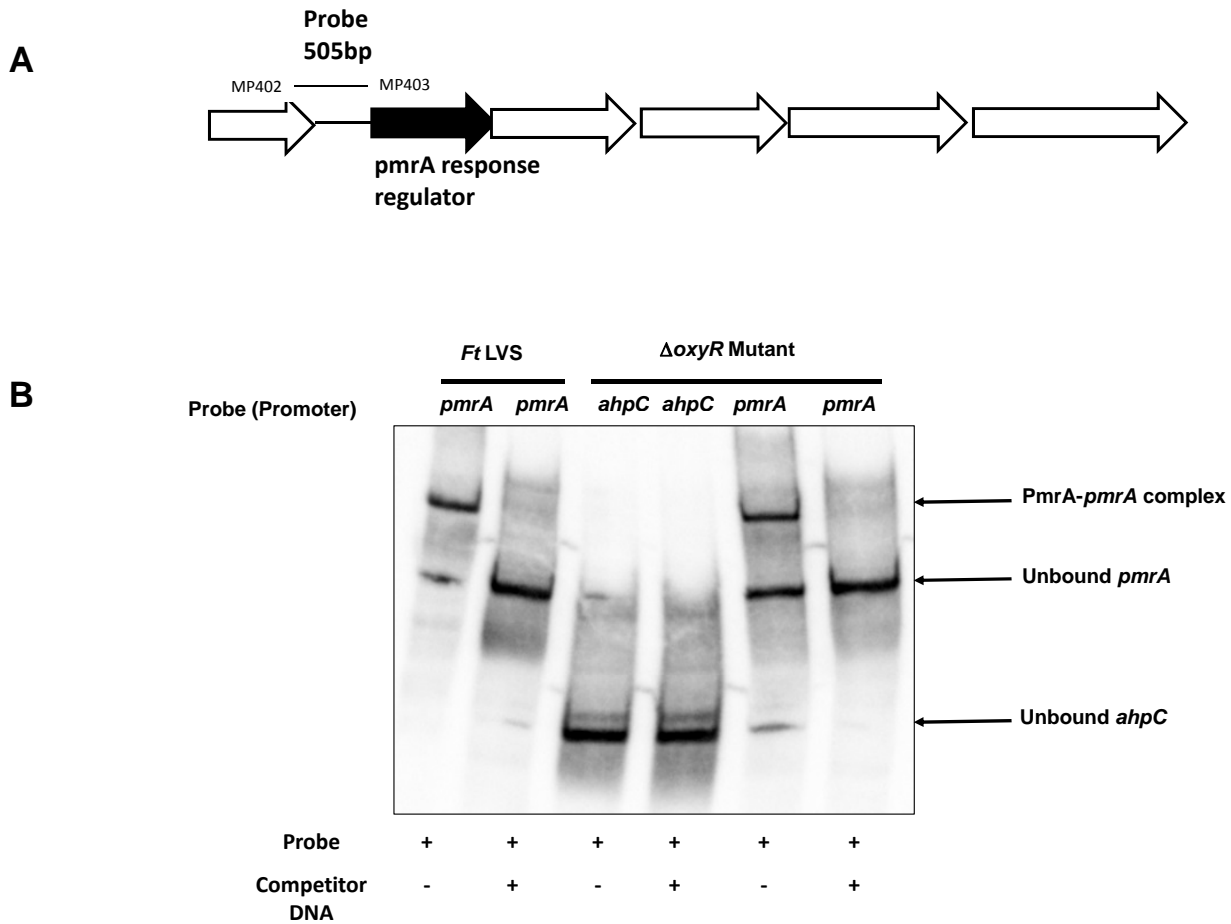

**Figure S3:** (A) Genomic organization of the *pmrA* gene and location of primers used for generation of biotinylated and competitor DNA. (B) The activity of lysates from the  $\Delta$ *oxyR* mutant was determined by binding of transcriptional regulator PmrA to its putative *pmrA* promoter region by EMSA. Biotinylated *pmrA* promoter region was used as probe, whereas unlabeled promoter region were used as controls. *ahpC* biotinylated probe and competitor DNA were also used. Results shown are representative of two independent experiments.

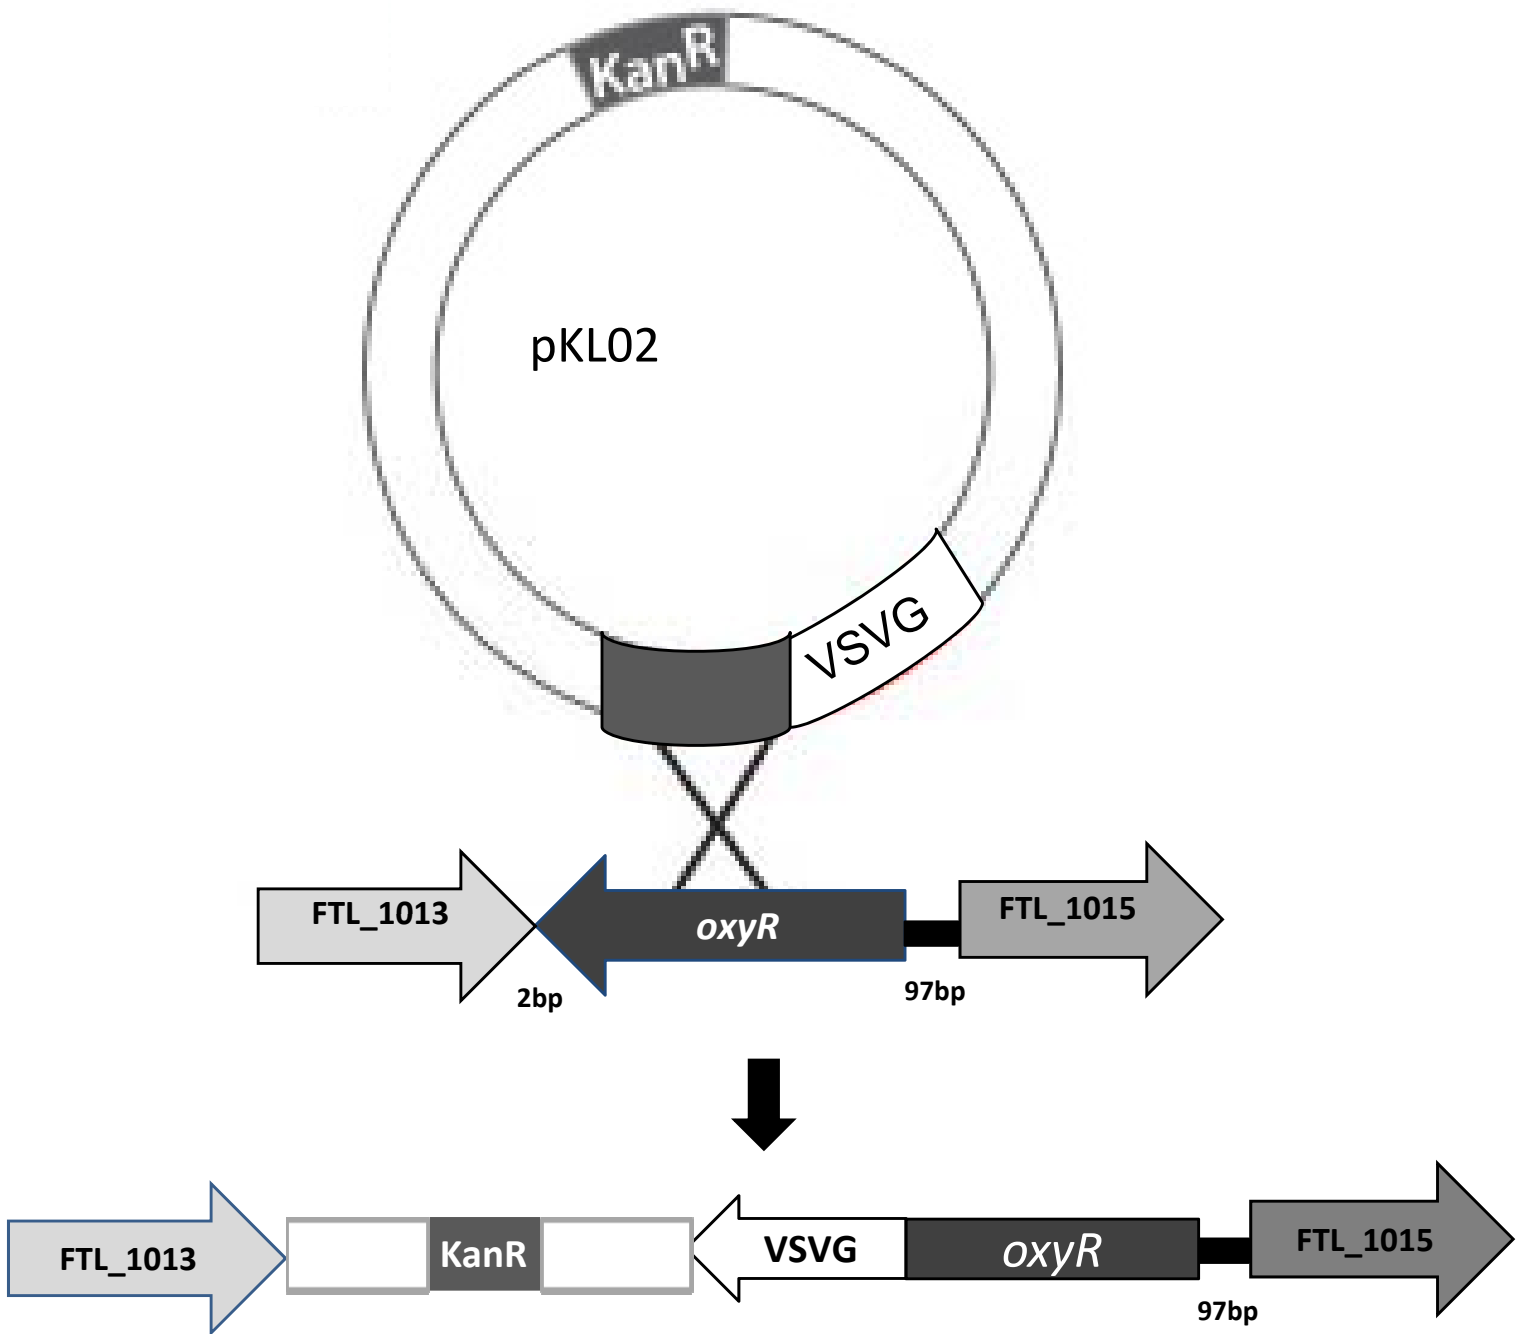

**Figure S4: OxyR-VSV-G construct.** The *oxyR* gene, minus the stop codon was amplified with primers MP316/317 using pfx Taq-DNA polymerase. The 5' primer has *SalI* site and the 3' primer included a *NotI* site. The fragment was cloned *in-frame* with 11 amino acid long VSV-G epitope tag into pKL02 shuttle vector. After purification, the plasmid was electroporated into wild type *F. tularensis* LVS. The positive clones were selected on the MH-chocolate agar plates containing kanamycin and confirmed by PCR and DNA sequencing.
